# Supplementary material for: The Patient Perspective on Living with Acute Myeloid Leukemia
Source: PubMed Central journal article supplement — Oncol Ther. 2016 Sep 2;4(2):225–38. doi: 10.1007/s40487-016-0029-8 (PMC5315065; doi:10.1007/s40487-016-0029-8), 2016-09-02
Supplement: 40487_2016_29_MOESM1_ESM.pdf [file 40487_2016_29_MOESM1_ESM.pdf]

**SUPPLEMENTARY MATERIAL**

**Table S1. Symptoms mentioned in US AML qualitative patient interviews.**

| <b>Symptom</b>         | <b>Overall<br/>(N = 23)</b> | <b>Newly-<br/>diagnosed,<br/>high-<br/>intensity<br/>(N = 10)</b> | <b>Newly-<br/>diagnosed,<br/>low-<br/>intensity<br/>(N = 4)</b> | <b>Relapse/<br/>Refractory<br/>(N = 3)</b> | <b>Transplant<br/>(N = 6)</b> |
|------------------------|-----------------------------|-------------------------------------------------------------------|-----------------------------------------------------------------|--------------------------------------------|-------------------------------|
| Fatigue                | 22                          | 10                                                                | 4                                                               | 3                                          | 5                             |
| Bruising               | 18                          | 7                                                                 | 2                                                               | 3                                          | 6                             |
| Weakness               | 18                          | 8                                                                 | 3                                                               | 2                                          | 5                             |
| Fever                  | 17                          | 9                                                                 | 2                                                               | 1                                          | 5                             |
| Anemia                 | 16                          | 8                                                                 | 2                                                               | 2                                          | 4                             |
| Diarrhea               | 16                          | 8                                                                 | 2                                                               | 1                                          | 5                             |
| Dizziness              | 15                          | 8                                                                 | 1                                                               | 2                                          | 4                             |
| Infection              | 15                          | 6                                                                 | 2                                                               | 3                                          | 4                             |
| Nausea                 | 15                          | 5                                                                 | 3                                                               | 3                                          | 4                             |
| Mouth sores            | 14                          | 5                                                                 | 3                                                               | 2                                          | 4                             |
| Shortness of breath    | 13                          | 7                                                                 | 1                                                               | 2                                          | 3                             |
| Bleeding               | 12                          | 7                                                                 | 1                                                               | 2                                          | 2                             |
| Headache               | 12                          | 5                                                                 | 1                                                               | 1                                          | 5                             |
| Bone pain              | 11                          | 5                                                                 | 2                                                               | 1                                          | 3                             |
| Vision/eye problems    | 11                          | 4                                                                 | 1                                                               | 1                                          | 5                             |
| Swollen/bleeding gums  | 9                           | 3                                                                 | 3                                                               | 2                                          | 1                             |
| Poor healing           | 8                           | 5                                                                 | 1                                                               | 0                                          | 2                             |
| Constipation           | 7                           | 3                                                                 | 1                                                               | 2                                          | 2                             |
| Vomiting               | 7                           | 3                                                                 | 1                                                               | 1                                          | 2                             |
| GI problems            | 6                           | 2                                                                 | 1                                                               | 2                                          | 1                             |
| Cardiovascular         | 5                           | 2                                                                 | 1                                                               | 0                                          | 2                             |
| Pain (muscle aches)    | 4                           | 2                                                                 | 0                                                               | 0                                          | 2                             |
| Sweats                 | 4                           | 0                                                                 | 1                                                               | 0                                          | 3                             |
| Petechiae              | 3                           | 1                                                                 | 1                                                               | 0                                          | 1                             |
| Anal fissure/fistula   | 2                           | 1                                                                 | 0                                                               | 0                                          | 0                             |
| Dry skin               | 2                           | 1                                                                 | 0                                                               | 0                                          | 1                             |
| Flu-like symptoms      | 2                           | 1                                                                 | 0                                                               | 0                                          | 0                             |
| Hair loss              | 2                           | 2                                                                 | 0                                                               | 0                                          | 0                             |
| Liver                  | 2                           | 2                                                                 | 0                                                               | 0                                          | 0                             |
| Pain (neuropathic)     | 2                           | 1                                                                 | 0                                                               | 0                                          | 1                             |
| Rash                   | 2                           | 1                                                                 | 0                                                               | 0                                          | 0                             |
| Sore throat            | 2                           | 1                                                                 | 1                                                               | 0                                          | 0                             |
| Asthma                 | 1                           | 0                                                                 | 0                                                               | 0                                          | 1                             |
| Blood blister in mouth | 1                           | 1                                                                 | 0                                                               | 0                                          | 0                             |
| Cellulitis             | 1                           | 0                                                                 | 0                                                               | 0                                          | 1                             |
| Dry mouth              | 1                           | 0                                                                 | 0                                                               | 0                                          | 1                             |
| Edema                  | 1                           | 1                                                                 | 0                                                               | 0                                          | 0                             |
| Graft vs. host         | 1                           | 0                                                                 | 0                                                               | 0                                          | 1                             |
| Hallucinations         | 1                           | 0                                                                 | 0                                                               | 1                                          | 0                             |
| Heat intolerance       | 1                           | 0                                                                 | 0                                                               | 0                                          | 1                             |
| Increased thirst       | 1                           | 0                                                                 | 0                                                               | 1                                          | 0                             |

|                        |   |   |   |   |   |
|------------------------|---|---|---|---|---|
| Infertility            | 1 | 0 | 0 | 0 | 1 |
| Lowered blood pressure | 1 | 1 | 0 | 0 | 0 |
| Moles                  | 1 | 0 | 0 | 0 | 1 |
| Injection pain         | 1 | 1 | 0 | 0 | 0 |
| Paleness               | 1 | 0 | 0 | 1 | 0 |
| Sepsis                 | 1 | 1 | 0 | 0 | 0 |
| Sunburn easily         | 1 | 0 | 0 | 0 | 1 |

---

*AML* acute myeloid leukemia, *GI* gastrointestinal.

**Table S2. Impacts mentioned in US AML qualitative patient interviews.**

| <b>Impact</b>                                       | <b>Overall<br/>(N = 23)</b> | <b>Newly-<br/>diagnosed,<br/>high-<br/>intensity<br/>(N = 10)</b> | <b>Newly-<br/>diagnosed,<br/>low-<br/>intensity<br/>(N = 4)</b> | <b>Relapse/<br/>Refractory<br/>(N = 3)</b> | <b>Transplant<br/>(N = 6)</b> |
|-----------------------------------------------------|-----------------------------|-------------------------------------------------------------------|-----------------------------------------------------------------|--------------------------------------------|-------------------------------|
| Decreased ability to maintain social/familial roles | 21                          | 9                                                                 | 3                                                               | 3                                          | 6                             |
| Anxiety                                             | 20                          | 7                                                                 | 4                                                               | 3                                          | 6                             |
| Decreased ability to function                       | 20                          | 9                                                                 | 2                                                               | 3                                          | 6                             |
| Financial difficulties                              | 17                          | 8                                                                 | 3                                                               | 3                                          | 3                             |
| Memory loss                                         | 17                          | 7                                                                 | 4                                                               | 1                                          | 5                             |
| Problems concentrating                              | 17                          | 5                                                                 | 3                                                               | 3                                          | 6                             |
| Depression                                          | 16                          | 6                                                                 | 1                                                               | 3                                          | 6                             |
| Fear                                                | 15                          | 6                                                                 | 3                                                               | 3                                          | 3                             |
| Weight loss                                         | 15                          | 5                                                                 | 2                                                               | 3                                          | 5                             |
| Remission uncertainty                               | 15                          | 6                                                                 | 4                                                               | 2                                          | 3                             |
| Appetite loss                                       | 14                          | 5                                                                 | 3                                                               | 2                                          | 4                             |
| Low sex drive                                       | 11                          | 4                                                                 | 1                                                               | 1                                          | 5                             |
| Denial                                              | 9                           | 6                                                                 | 2                                                               | 0                                          | 1                             |
| Concern about infection                             | 7                           | 6                                                                 | 0                                                               | 0                                          | 1                             |
| Weight gain                                         | 5                           | 3                                                                 | 0                                                               | 1                                          | 1                             |
| Risk of other cancer                                | 4                           | 3                                                                 | 1                                                               | 0                                          | 0                             |
| Sleeplessness                                       | 3                           | 1                                                                 | 2                                                               | 0                                          | 0                             |
| Improved relationships                              | 2                           | 0                                                                 | 0                                                               | 1                                          | 1                             |
| Positive attitude                                   | 2                           | 1                                                                 | 0                                                               | 1                                          | 0                             |
| Uncertainty about future health                     | 2                           | 1                                                                 | 1                                                               | 0                                          | 0                             |
| Appetite gain                                       | 1                           | 1                                                                 | 0                                                               | 0                                          | 0                             |
| Blaming myself                                      | 1                           | 0                                                                 | 0                                                               | 1                                          | 0                             |
| Herpes flare ups                                    | 1                           | 0                                                                 | 1                                                               | 0                                          | 0                             |
| Sterile                                             | 1                           | 0                                                                 | 1                                                               | 0                                          | 0                             |

*AML* acute myeloid leukemia.

**Table S3. Symptoms mentioned in Japan AML qualitative patient interviews.**

| <b>Symptom</b>          | <b>Overall<br/>(N = 18)</b> | <b>Newly-<br/>diagnosed,<br/>high-<br/>intensity<br/>(N = 5)</b> | <b>Newly-<br/>diagnosed,<br/>high-<br/>intensity<br/>(N = 10)</b> | <b>Relapse/<br/>Refractory<br/>(N = 6)</b> | <b>Transplant<br/>(N = 2)</b> |
|-------------------------|-----------------------------|------------------------------------------------------------------|-------------------------------------------------------------------|--------------------------------------------|-------------------------------|
| Nausea                  | 17                          | 5                                                                | 4                                                                 | 6                                          | 2                             |
| Fatigue                 | 16                          | 4                                                                | 4                                                                 | 6                                          | 2                             |
| Headache                | 16                          | 3                                                                | 5                                                                 | 6                                          | 2                             |
| Shortness of breath     | 15                          | 2                                                                | 5                                                                 | 6                                          | 2                             |
| Weakness                | 15                          | 3                                                                | 4                                                                 | 6                                          | 2                             |
| Vomiting                | 14                          | 5                                                                | 3                                                                 | 4                                          | 2                             |
| Bleeding                | 13                          | 3                                                                | 4                                                                 | 4                                          | 2                             |
| Cardiovascular problems | 12                          | 1                                                                | 5                                                                 | 5                                          | 1                             |
| Dizziness               | 12                          | 2                                                                | 2                                                                 | 6                                          | 2                             |
| Fever                   | 12                          | 4                                                                | 3                                                                 | 3                                          | 2                             |
| Poor healing            | 12                          | 1                                                                | 5                                                                 | 4                                          | 2                             |
| Anemia                  | 11                          | 2                                                                | 2                                                                 | 5                                          | 2                             |
| Diarrhea                | 11                          | 3                                                                | 2                                                                 | 4                                          | 2                             |
| Constipation            | 9                           | 1                                                                | 1                                                                 | 6                                          | 1                             |
| Infection               | 9                           | 3                                                                | 3                                                                 | 2                                          | 1                             |
| Pain                    | 9                           | 1                                                                | 4                                                                 | 3                                          | 1                             |
| Bruising                | 7                           | 1                                                                | 3                                                                 | 1                                          | 2                             |
| GI problems             | 5                           | 2                                                                | 0                                                                 | 3                                          | 0                             |
| Swollen/bleeding gums   | 5                           | 2                                                                | 0                                                                 | 1                                          | 2                             |
| Vision problems         | 5                           | 0                                                                | 3                                                                 | 2                                          | 0                             |
| Mouth sores             | 4                           | 0                                                                | 0                                                                 | 3                                          | 1                             |
| Sleeplessness           | 2                           | 0                                                                | 0                                                                 | 2                                          | 0                             |
| Dry skin                | 1                           | 1                                                                | 0                                                                 | 0                                          | 0                             |
| Edema                   | 1                           | 1                                                                | 0                                                                 | 0                                          | 0                             |
| Flu like symptoms       | 1                           | 1                                                                | 0                                                                 | 0                                          | 0                             |
| Hair loss               | 1                           | 1                                                                | 0                                                                 | 0                                          | 0                             |
| High blood pressure     | 1                           | 0                                                                | 0                                                                 | 0                                          | 1                             |
| Injection pain          | 1                           | 0                                                                | 0                                                                 | 0                                          | 1                             |
| Pain (back)             | 1                           | 0                                                                | 0                                                                 | 1                                          | 0                             |
| Pain (muscle)           | 1                           | 0                                                                | 0                                                                 | 1                                          | 0                             |
| Subcutaneous mass       | 1                           | 1                                                                | 0                                                                 | 0                                          | 0                             |

*AML* acute myeloid leukemia, *GI* gastrointestinal.

**Table S4. Impacts mentioned in Japan AML qualitative patient interviews.**

| <b>Impact</b>                                            | <b>Overall<br/>(N = 18)</b> | <b>Newly-<br/>diagnosed,<br/>high-<br/>intensity<br/>(N = 5)</b> | <b>Newly-<br/>diagnosed,<br/>high-<br/>intensity<br/>(N = 10)</b> | <b>Relapse/<br/>Refractory<br/>(N = 6)</b> | <b>Transplant<br/>(N = 2)</b> |
|----------------------------------------------------------|-----------------------------|------------------------------------------------------------------|-------------------------------------------------------------------|--------------------------------------------|-------------------------------|
| Anxiety                                                  | 17                          | 5                                                                | 5                                                                 | 5                                          | 2                             |
| Decreased ability to<br>function                         | 17                          | 4                                                                | 5                                                                 | 6                                          | 2                             |
| Remission uncertainty                                    | 17                          | 5                                                                | 5                                                                 | 5                                          | 2                             |
| Financial difficulties                                   | 14                          | 4                                                                | 3                                                                 | 5                                          | 2                             |
| Appetite loss                                            | 13                          | 1                                                                | 4                                                                 | 6                                          | 2                             |
| Decreased ability to<br>maintain<br>social/familial role | 13                          | 2                                                                | 4                                                                 | 5                                          | 2                             |
| Fear                                                     | 12                          | 2                                                                | 4                                                                 | 5                                          | 1                             |
| Problems concentrating                                   | 11                          | 1                                                                | 4                                                                 | 4                                          | 2                             |
| Risk of other cancer                                     | 10                          | 1                                                                | 3                                                                 | 6                                          | 0                             |
| Weight loss                                              | 10                          | 1                                                                | 4                                                                 | 4                                          | 1                             |
| Depression                                               | 7                           | 2                                                                | 2                                                                 | 2                                          | 1                             |
| Low sex drive                                            | 7                           | 0                                                                | 1                                                                 | 4                                          | 2                             |
| Paleness                                                 | 4                           | 1                                                                | 1                                                                 | 2                                          | 0                             |
| Memory loss                                              | 3                           | 0                                                                | 2                                                                 | 0                                          | 1                             |
| Alienation                                               | 2                           | 0                                                                | 0                                                                 | 2                                          | 0                             |
| Denial                                                   | 2                           | 0                                                                | 0                                                                 | 1                                          | 1                             |
| Infertility                                              | 2                           | 2                                                                | 0                                                                 | 0                                          | 0                             |
| Sadness                                                  | 2                           | 0                                                                | 1                                                                 | 1                                          | 0                             |
| Abortion                                                 | 1                           | 1                                                                | 0                                                                 | 0                                          | 0                             |
| Anger                                                    | 1                           | 0                                                                | 0                                                                 | 1                                          | 0                             |
| Sleeping problems                                        | 1                           | 0                                                                | 1                                                                 | 0                                          | 0                             |

*AML* acute myeloid leukemia.
